# Supplementary material
Source: PubMed Central journal article supplement (PMC5100818)
Supplement: NIHMS442443-supplement-SuppMat.pdf [file NIHMS442443-supplement-SuppMat.pdf]

1 **Supplemental Figure Captions**

2

3 **Figure S1.** Principal coordinate plots of weighted UniFrac distances showing clustering  
4 of individual surface types across the four kitchens examined. Letters in each plot  
5 indicate the kitchen of origin.

6

7 **Figure S2.** Principal coordinate plots of weighted UniFrac distances overlaid with the  
8 abundance of the Proteobacteria (**A**) and Firmicutes (**B**). Bubbles are scaled according to  
9 abundance of each phyla.

10

11 **Figure S3.** Indicator taxa identified by SIMPER for raw produce (**A**), human skin  
12 (palms) (**B**) and faucet water (**C**).

13

14 **Figure S4.** Results of SourceTracker showing relative contributions of skin (**A**), produce  
15 (**B**) and faucet water (**C**) to kitchen surface bacterial communities. Figures are  
16 independent of each other and are colored so that the darker shades indicate a relatively  
17 higher abundance of bacteria derived from that particular source. Figures not drawn to  
18 scale.



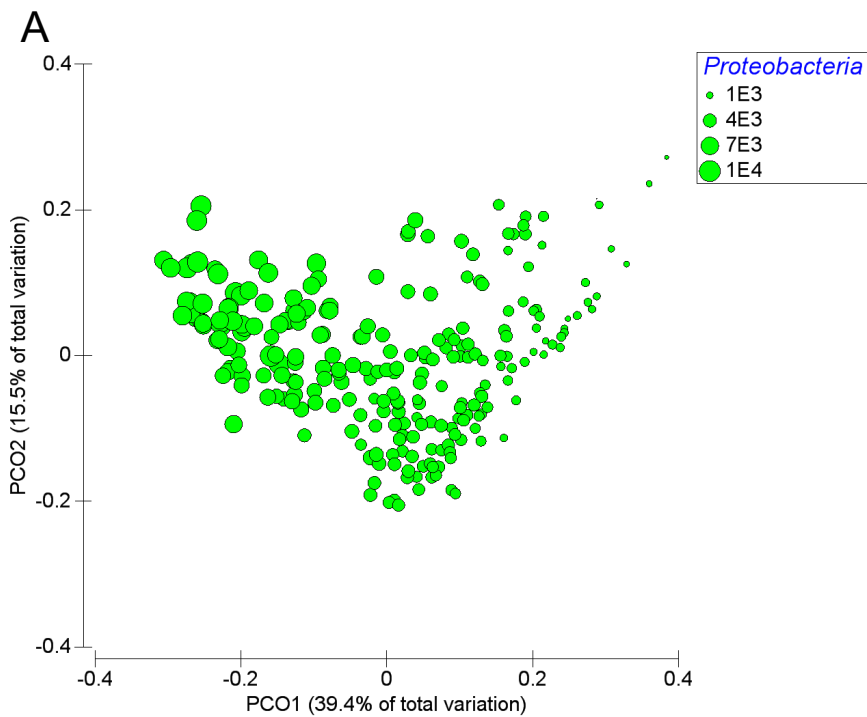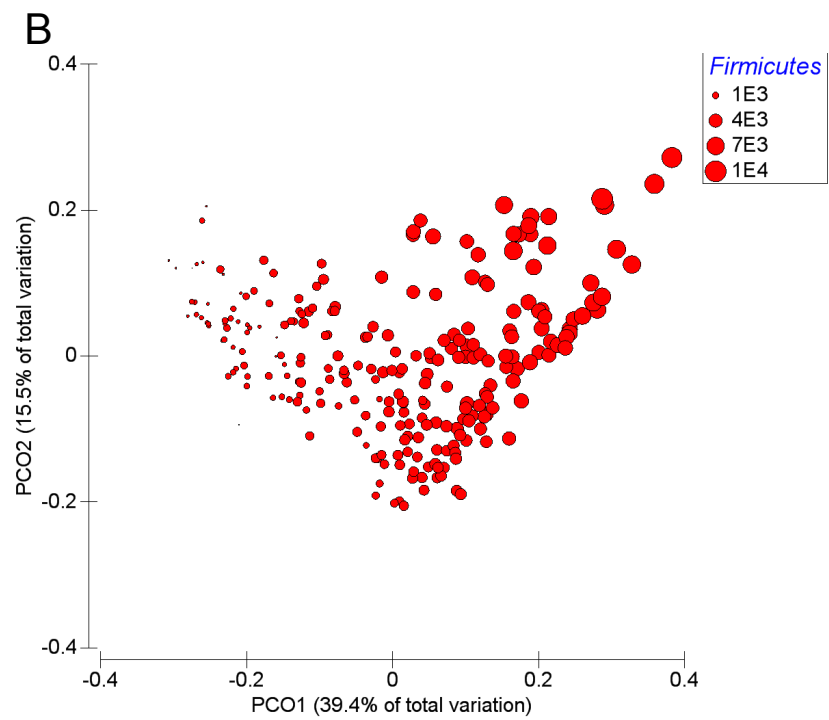

**A**

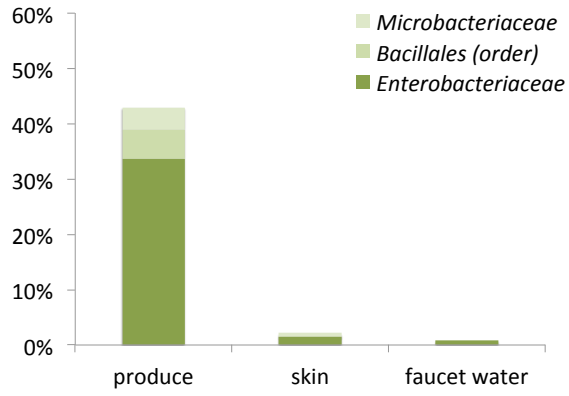

**B**

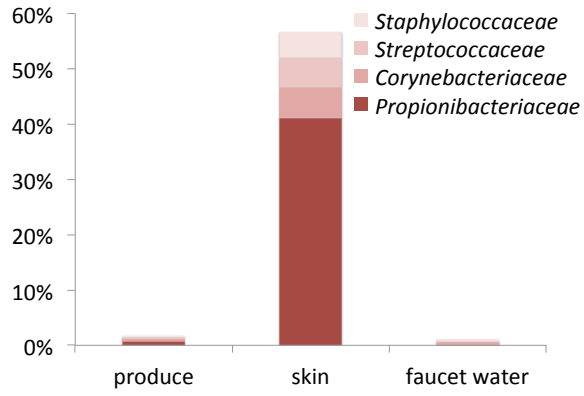

**C**

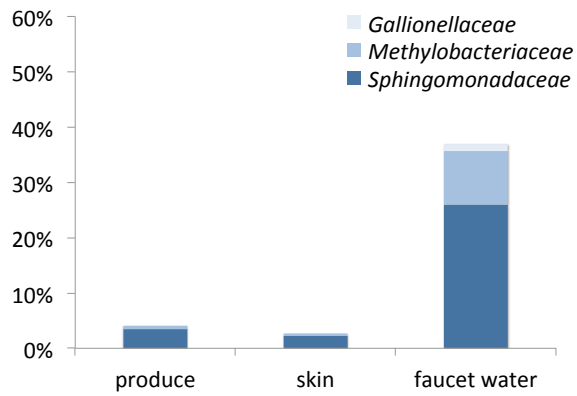

A: skin (palm)

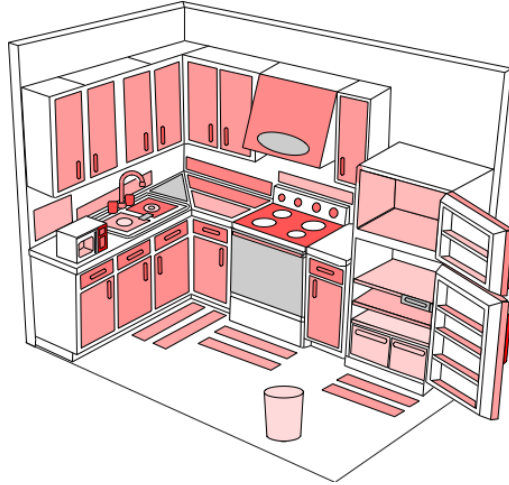

B: produce

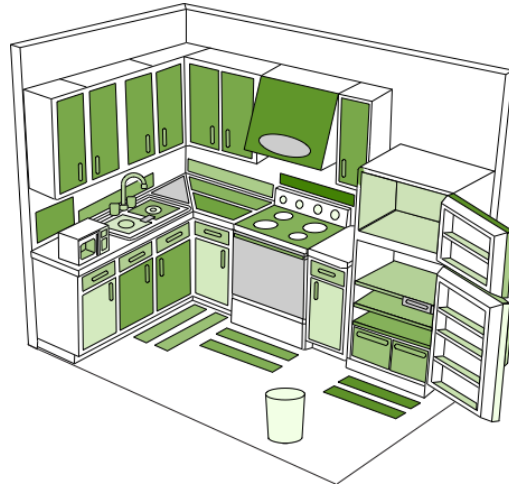

C: faucet H<sub>2</sub>O

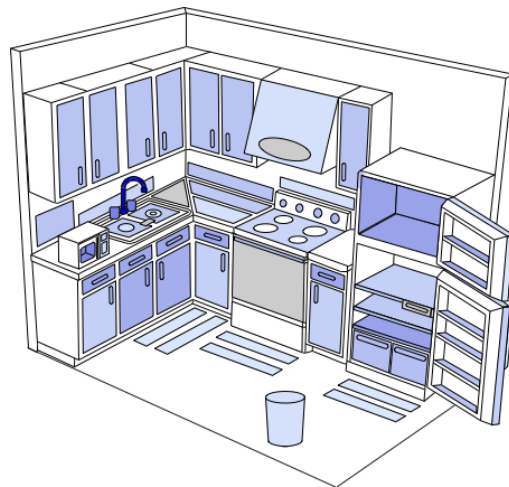

**Supplementary Table 1.** Summary of kitchen surfaces for which over 10,000 quality 16S rRNA gene sequence fragments were obtained and used to examine bacterial biogeography of residential kitchens.

| Sample name | Kitchen | Generic surface name       | Kitchen area <sup>1</sup> | OTU's observed* | Phylogenetic diversity* |
|-------------|---------|----------------------------|---------------------------|-----------------|-------------------------|
| KiA12       | A       | Lower cabinet door sink    | Cabinet - lower           | 560             | 33.22                   |
| KiA13       | A       | Lower cabinet handle sink  | Cabinet - lower           | 494             | 28.64                   |
| KiA14       | A       | Lower cabinet handle       | Cabinet - lower           | 367             | 24.31                   |
| KiA19       | A       | Countertop back            | Counter                   | 208             | 12.69                   |
| KiA26       | A       | Countertop back            | Counter                   | 249             | 15.60                   |
| KiA27       | A       | Upper cabinet handle       | Cabinet - upper           | 291             | 18.65                   |
| KiA28       | A       | Upper cabinet door         | Cabinet - upper           | 255             | 16.62                   |
| KiA29       | A       | Refrigerator handle        | Refrigerator - out        | 449             | 29.56                   |
| KiA34       | A       | Refrigerator middle shelf  | Refrigerator - in         | 292             | 18.06                   |
| KiA35       | A       | Refrigerator middle shelf  | Refrigerator - in         | 596             | 34.36                   |
| KiA36       | A       | Refrigerator bottom shelf  | Refrigerator - in         | 217             | 12.06                   |
| KiA37       | A       | Refrigerator bottom shelf  | Refrigerator - in         | 484             | 28.98                   |
| KiA39       | A       | Refrigerator drawer        | Refrigerator - in         | 147             | 9.65                    |
| KiA40       | A       | Refrigerator interior door | Refrigerator - in         | 471             | 31.17                   |
| KiA41       | A       | Refrigerator interior door | Refrigerator - in         | 408             | 25.62                   |

|       |   |                      |                 |       |       |
|-------|---|----------------------|-----------------|-------|-------|
| KiA43 | A | Freezer door         | Freezer - out   | 279   | 15.82 |
| KiA44 | A | Freezer seal         | Freezer - out   | 1,030 | 56.40 |
| KiA45 | A | Freezer interior     | Freezer - in    | 249   | 16.72 |
| KiA46 | A | Freezer interior     | Freezer - in    | 276   | 17.09 |
| KiA49 | A | Lower cabinet handle | Cabinet - lower | 301   | 18.48 |
| KiA50 | A | Lower cabinet door   | Cabinet - lower | 492   | 30.35 |
| KiA51 | A | Countertop front     | Counter         | 338   | 21.34 |
| KiA52 | A | Countertop back      | Counter         | 701   | 41.85 |
| KiA53 | A | Lower cabinet handle | Cabinet - lower | 572   | 34.07 |
| KiA54 | A | Lower cabinet door   | Cabinet - lower | 591   | 36.72 |
| KiA55 | A | Countertop front     | Counter         | 673   | 39.07 |
| KiA56 | A | Countertop back      | Counter         | 651   | 38.22 |
| KiA58 | A | Oven handle          | Oven/Stove      | 233   | 14.88 |
| KiA59 | A | Stove top            | Oven/Stove      | 379   | 25.11 |
| KiA6  | A | Left sink basin      | Sink            | 198   | 13.69 |
| KiA61 | A | Stove fan exterior   | Stove fan       | 1,245 | 64.04 |
| KiA65 | A | Microwave handle     | Microwave       | 291   | 18.51 |

|       |   |                         |                 |       |       |
|-------|---|-------------------------|-----------------|-------|-------|
| KiA66 | A | Microwave panel         | Microwave       | 283   | 18.14 |
| KiA67 | A | Microwave interior      | Microwave       | 185   | 15.52 |
| KiA68 | A | Sink floor              | Floor           | 917   | 50.49 |
| KiA69 | A | Sink floor              | Floor           | 1,136 | 62.52 |
| KiA7  | A | Left sink drain         | Sink            | 181   | 9.90  |
| KiA70 | A | Cabinet floor           | Floor           | 1,081 | 57.36 |
| KiA74 | A | Refrigerator floor      | Floor           | 610   | 36.29 |
| KiA76 | A | Wall                    | Wall/backsplash | 509   | 27.90 |
| KiA77 | A | Stove backsplash        | Wall/backsplash | 689   | 39.12 |
| KiA8  | A | Right sink basin        | Sink            | 149   | 9.04  |
| KiA82 | A | Lower cabinet handle    | Cabinet - lower | 446   | 27.54 |
| KiB10 | B | Right sink drain        | Sink            | 81    | 6.38  |
| KiB12 | B | Lower cabinet door sink | Cabinet - lower | 877   | 51.42 |
| KiB18 | B | Countertop front        | Counter         | 431   | 26.87 |
| KiB19 | B | Countertop back         | Counter         | 894   | 51.16 |
| KiB2  | B | Faucet                  | Sink            | 130   | 8.68  |
| KiB22 | B | Lower cabinet handle    | Cabinet - lower | 397   | 22.55 |



|       |   |                            |                   |       |       |
|-------|---|----------------------------|-------------------|-------|-------|
| KiB23 | B | Lower cabinet door         | Cabinet - lower   | 366   | 24.21 |
| KiB24 | B | Drawer                     | Drawer            | 634   | 37.20 |
| KiB26 | B | Countertop back            | Counter           | 597   | 36.24 |
| KiB27 | B | Upper cabinet handle       | Cabinet - upper   | 404   | 23.40 |
| KiB28 | B | Upper cabinet door         | Cabinet - upper   | 409   | 24.62 |
| KiB32 | B | Refrigerator top shelf     | Refrigerator - in | 588   | 35.37 |
| KiB33 | B | Refrigerator top shelf     | Refrigerator - in | 882   | 46.00 |
| KiB34 | B | Refrigerator middle shelf  | Refrigerator - in | 1,071 | 56.72 |
| KiB35 | B | Refrigerator middle shelf  | Refrigerator - in | 489   | 30.16 |
| KiB36 | B | Refrigerator bottom shelf  | Refrigerator - in | 1,077 | 54.97 |
| KiB37 | B | Refrigerator bottom shelf  | Refrigerator - in | 918   | 47.83 |
| KiB38 | B | Refrigerator drawer        | Refrigerator - in | 378   | 24.05 |
| KiB39 | B | Refrigerator drawer        | Refrigerator - in | 403   | 23.52 |
| KiB40 | B | Refrigerator interior door | Refrigerator - in | 447   | 28.46 |
| KiB42 | B | Freezer handle             | Freezer - out     | 408   | 24.14 |
| KiB43 | B | Freezer door               | Freezer - out     | 478   | 29.04 |
| KiB44 | B | Freezer seal               | Freezer - out     | 1,006 | 54.09 |

|       |   |                       |                 |       |       |
|-------|---|-----------------------|-----------------|-------|-------|
| KiB46 | B | Freezer interior      | Freezer - in    | 479   | 28.56 |
| KiB47 | B | Freezer interior door | Freezer - in    | 329   | 18.88 |
| KiB48 | B | Freezer interior      | Freezer - in    | 657   | 37.84 |
| KiB49 | B | Lower cabinet handle  | Cabinet - lower | 444   | 26.48 |
| KiB5  | B | Left sink basin       | Sink            | 269   | 17.03 |
| KiB50 | B | Lower cabinet door    | Cabinet - lower | 508   | 29.62 |
| KiB51 | B | Countertop front      | Counter         | 446   | 25.50 |
| KiB52 | B | Countertop back       | Counter         | 429   | 23.48 |
| KiB54 | B | Lower cabinet door    | Cabinet - lower | 683   | 40.25 |
| KiB57 | B | Stove knobs           | Oven/Stove      | 331   | 18.95 |
| KiB59 | B | Stove top             | Oven/Stove      | 585   | 35.78 |
| KiB6  | B | Left sink basin       | Sink            | 115   | 9.62  |
| KiB61 | B | Stove fan exterior    | Stove fan       | 1,068 | 59.23 |
| KiB62 | B | Lower cabinet handle  | Cabinet - lower | 772   | 42.02 |
| KiB63 | B | Lower cabinet handle  | Cabinet - lower | 655   | 38.80 |
| KiB66 | B | Microwave panel       | Microwave       | 476   | 28.01 |
| KiB68 | B | Sink floor            | Floor           | 926   | 54.03 |

|       |   |                    |                 |     |       |
|-------|---|--------------------|-----------------|-----|-------|
| KiB69 | B | Sink floor         | Floor           | 806 | 47.19 |
| KiB7  | B | Left sink drain    | Sink            | 133 | 9.04  |
| KiB70 | B | Cabinet floor      | Floor           | 794 | 46.28 |
| KiB71 | B | Cabinet floor      | Floor           | 561 | 33.28 |
| KiB72 | B | Cabinet floor      | Floor           | 689 | 40.90 |
| KiB73 | B | Cabinet floor      | Floor           | 969 | 53.96 |
| KiB74 | B | Refrigerator floor | Floor           | 833 | 48.12 |
| KiB75 | B | Refrigerator floor | Floor           | 950 | 51.59 |
| KiB76 | B | Wall               | Wall/backsplash | 662 | 37.45 |
| KiB77 | B | Stove backsplash   | Wall/backsplash | 358 | 23.87 |
| KiB78 | B | Sink backsplash    | Wall/backsplash | 524 | 29.91 |
| KiB79 | B | Wall               | Wall/backsplash | 415 | 24.68 |
| KiB8  | B | Right sink basin   | Sink            | 239 | 15.27 |
| KiB81 | B | Counter backsplash | Wall/backsplash | 341 | 21.55 |
| KiB82 | B | Counter backsplash | Wall/backsplash | 375 | 23.41 |
| KiB9  | B | Right sink basin   | Sink            | 248 | 15.44 |
| KiC1  | C | Faucet handle      | Sink            | 186 | 11.12 |

|       |   |                           |                    |       |       |
|-------|---|---------------------------|--------------------|-------|-------|
| KiC10 | C | Right sink drain          | Sink               | 225   | 13.46 |
| KiC11 | C | Lower cabinet handle sink | Cabinet - lower    | 491   | 31.31 |
| KiC12 | C | Lower cabinet door sink   | Cabinet - lower    | 587   | 36.13 |
| KiC13 | C | Lower cabinet handle sink | Cabinet - lower    | 461   | 29.82 |
| KiC14 | C | Lower cabinet door sink   | Cabinet - lower    | 905   | 48.36 |
| KiC15 | C | Lower cabinet handle      | Cabinet - lower    | 608   | 38.04 |
| KiC16 | C | Lower cabinet door        | Cabinet - lower    | 351   | 20.21 |
| KiC18 | C | Countertop front          | Counter            | 333   | 23.70 |
| KiC19 | C | Countertop back           | Counter            | 562   | 36.22 |
| KiC2  | C | Faucet                    | Sink               | 223   | 14.88 |
| KiC20 | C | Upper cabinet handle      | Cabinet - upper    | 380   | 24.70 |
| KiC22 | C | Lower cabinet handle      | Cabinet - lower    | 275   | 16.00 |
| KiC24 | C | Drawer                    | Drawer             | 348   | 21.46 |
| KiC25 | C | Countertop front          | Counter            | 141   | 9.80  |
| KiC26 | C | Countertop back           | Counter            | 557   | 36.06 |
| KiC28 | C | Upper cabinet door        | Cabinet - upper    | 1,019 | 55.30 |
| KiC29 | C | Refrigerator handle       | Refrigerator - out | 398   | 26.65 |

|       |   |                            |                    |     |       |
|-------|---|----------------------------|--------------------|-----|-------|
| KiC30 | C | Refrigerator door          | Refrigerator - out | 316 | 20.58 |
| KiC31 | C | Refrigerator seal          | Refrigerator - out | 572 | 34.58 |
| KiC32 | C | Refrigerator top shelf     | Refrigerator - in  | 307 | 19.13 |
| KiC33 | C | Refrigerator top shelf     | Refrigerator - in  | 425 | 27.25 |
| KiC34 | C | Refrigerator middle shelf  | Refrigerator - in  | 514 | 31.10 |
| KiC35 | C | Refrigerator middle shelf  | Refrigerator - in  | 467 | 28.60 |
| KiC36 | C | Refrigerator bottom shelf  | Refrigerator - in  | 535 | 31.11 |
| KiC37 | C | Refrigerator bottom shelf  | Refrigerator - in  | 277 | 16.75 |
| KiC38 | C | Refrigerator drawer        | Refrigerator - in  | 681 | 34.88 |
| KiC39 | C | Refrigerator drawer        | Refrigerator - in  | 536 | 30.76 |
| KiC40 | C | Refrigerator interior door | Refrigerator - in  | 212 | 13.55 |
| KiC41 | C | Refrigerator interior door | Refrigerator - in  | 392 | 25.49 |
| KiC42 | C | Freezer handle             | Freezer - out      | 347 | 22.36 |
| KiC43 | C | Freezer door               | Freezer - out      | 250 | 18.06 |
| KiC44 | C | Freezer seal               | Freezer - out      | 559 | 35.92 |
| KiC45 | C | Freezer interior           | Freezer - in       | 440 | 27.15 |
| KiC46 | C | Freezer interior           | Freezer - in       | 413 | 28.82 |

|       |   |                       |                 |       |       |
|-------|---|-----------------------|-----------------|-------|-------|
| KiC48 | C | Freezer interior door | Freezer - in    | 130   | 10.51 |
| KiC5  | C | Left sink basin       | Sink            | 283   | 17.35 |
| KiC50 | C | Lower cabinet door    | Cabinet - lower | 253   | 16.18 |
| KiC51 | C | Countertop front      | Counter         | 401   | 27.70 |
| KiC52 | C | Countertop back       | Counter         | 972   | 55.94 |
| KiC53 | C | Lower cabinet handle  | Cabinet - lower | 221   | 13.39 |
| KiC54 | C | Lower cabinet door    | Cabinet - lower | 373   | 23.24 |
| KiC55 | C | Countertop front      | Counter         | 366   | 26.28 |
| KiC56 | C | Countertop back       | Counter         | 430   | 28.41 |
| KiC57 | C | Stove knobs           | Oven/Stove      | 355   | 23.71 |
| KiC58 | C | Oven handle           | Oven/Stove      | 236   | 16.01 |
| KiC59 | C | Stove top             | Oven/Stove      | 292   | 22.28 |
| KiC6  | C | Left sink basin       | Sink            | 299   | 18.02 |
| KiC62 | C | Lower cabinet handle  | Cabinet - lower | 209   | 13.57 |
| KiC64 | C | Drawer                | Drawer          | 330   | 23.32 |
| KiC68 | C | Sink floor            | Floor           | 1,495 | 78.35 |
| KiC69 | C | Sink floor            | Floor           | 1,493 | 77.48 |

|       |   |                    |                 |       |       |
|-------|---|--------------------|-----------------|-------|-------|
| KiC7  | C | Left sink drain    | Sink            | 285   | 16.79 |
| KiC70 | C | Cabinet floor      | Floor           | 1,375 | 74.39 |
| KiC71 | C | Cabinet floor      | Floor           | 1,422 | 75.00 |
| KiC72 | C | Cabinet floor      | Floor           | 1,506 | 79.39 |
| KiC73 | C | Cabinet floor      | Floor           | 1,404 | 73.90 |
| KiC74 | C | Refrigerator floor | Floor           | 1,400 | 75.37 |
| KiC75 | C | Refrigerator floor | Floor           | 1,557 | 80.35 |
| KiC76 | C | Wall               | Wall/backsplash | 663   | 42.34 |
| KiC77 | C | Stove backsplash   | Wall/backsplash | 599   | 39.30 |
| KiC78 | C | Sink backsplash    | Wall/backsplash | 382   | 26.55 |
| KiC8  | C | Right sink basin   | Sink            | 255   | 15.25 |
| KiC80 | C | Wall               | Wall/backsplash | 450   | 28.66 |
| KiC81 | C | Counter backsplash | Wall/backsplash | 445   | 30.55 |
| KiC82 | C | Counter backsplash | Wall/backsplash | 489   | 32.82 |
| KiC83 | C | Garbage can        | Other           | 388   | 24.10 |
| KiC84 | C | Garbage disposal   | Sink            | 357   | 24.16 |
| KiC9  | C | Right sink basin   | Sink            | 208   | 11.95 |

|       |   |                           |                 |     |       |
|-------|---|---------------------------|-----------------|-----|-------|
| KiD1  | D | Faucet handle             | Sink            | 392 | 23.97 |
| KiD10 | D | Right sink drain          | Sink            | 154 | 8.50  |
| KiD11 | D | Lower cabinet handle sink | Cabinet - lower | 366 | 22.00 |
| KiD12 | D | Lower cabinet door sink   | Cabinet - lower | 481 | 28.17 |
| KiD13 | D | Lower cabinet handle sink | Cabinet - lower | 330 | 18.90 |
| KiD14 | D | Lower cabinet door sink   | Cabinet - lower | 546 | 31.71 |
| KiD15 | D | Lower cabinet handle      | Cabinet - lower | 620 | 37.45 |
| KiD16 | D | Lower cabinet door        | Cabinet - lower | 415 | 23.36 |
| KiD17 | D | Drawer                    | Drawer          | 386 | 24.19 |
| KiD19 | D | Countertop back           | Counter         | 598 | 33.97 |
| KiD2  | D | Faucet                    | Sink            | 173 | 11.97 |
| KiD20 | D | Upper cabinet handle      | Cabinet - upper | 305 | 19.11 |
| KiD21 | D | Upper cabinet door        | Cabinet - upper | 352 | 20.82 |
| KiD24 | D | Drawer                    | Drawer          | 494 | 30.69 |
| KiD25 | D | Countertop front          | Counter         | 739 | 41.02 |
| KiD26 | D | Countertop back           | Counter         | 954 | 51.65 |
| KiD27 | D | Upper cabinet handle      | Cabinet - upper | 376 | 23.54 |



|       |   |                               |                    |       |       |
|-------|---|-------------------------------|--------------------|-------|-------|
| KiD28 | D | Upper cabinet door            | Cabinet - upper    | 467   | 26.31 |
| KiD29 | D | Refrigerator handle           | Refrigerator - out | 248   | 16.11 |
| KiD3  | D | Faucet water                  | Water              | 62    | 5.29  |
| KiD30 | D | Refrigerator door             | Refrigerator - out | 406   | 24.80 |
| KiD31 | D | Refrigerator seal             | Refrigerator - out | 815   | 45.01 |
| KiD33 | D | Refrigerator top shelf        | Refrigerator - in  | 359   | 20.95 |
| KiD34 | D | Refrigerator middle shelf     | Refrigerator - in  | 634   | 34.79 |
| KiD35 | D | Refrigerator lunchmeat drawer | Refrigerator - in  | 497   | 28.87 |
| KiD36 | D | Refrigerator bottom shelf     | Refrigerator - in  | 470   | 29.39 |
| KiD37 | D | Refrigerator bottom shelf     | Refrigerator - in  | 1,048 | 52.30 |
| KiD38 | D | Refrigerator drawer           | Refrigerator - in  | 740   | 39.26 |
| KiD39 | D | Refrigerator drawer           | Refrigerator - in  | 648   | 33.98 |
| KiD40 | D | Refrigerator interior door    | Refrigerator - in  | 839   | 46.49 |
| KiD41 | D | Refrigerator interior door    | Refrigerator - in  | 741   | 39.65 |
| KiD42 | D | Freezer handle                | Freezer - out      | 283   | 19.12 |
| KiD43 | D | Freezer door                  | Freezer - out      | 360   | 21.63 |
| KiD44 | D | Freezer seal                  | Freezer - out      | 1,189 | 59.23 |

|       |   |                       |                 |     |       |
|-------|---|-----------------------|-----------------|-----|-------|
| KiD45 | D | Freezer interior      | Freezer - in    | 386 | 20.80 |
| KiD46 | D | Freezer interior      | Freezer - in    | 437 | 23.16 |
| KiD47 | D | Freezer interior door | Freezer - in    | 358 | 21.34 |
| KiD48 | D | Freezer interior door | Freezer - in    | 319 | 19.01 |
| KiD49 | D | Drawer                | Drawer          | 483 | 27.79 |
| KiD5  | D | Left sink basin       | Sink            | 293 | 18.56 |
| KiD50 | D | Drawer                | Drawer          | 372 | 21.60 |
| KiD51 | D | Countertop front      | Counter         | 671 | 39.35 |
| KiD52 | D | Countertop back       | Counter         | 997 | 54.15 |
| KiD53 | D | Lower cabinet handle  | Cabinet - lower | 346 | 23.02 |
| KiD54 | D | Lower cabinet door    | Cabinet - lower | 645 | 36.49 |
| KiD56 | D | Countertop back       | Counter         | 616 | 36.26 |
| KiD57 | D | Stove knobs           | Oven/Stove      | 339 | 21.27 |
| KiD58 | D | Oven handle           | Oven/Stove      | 870 | 47.23 |
| KiD59 | D | Stove top             | Oven/Stove      | 734 | 42.65 |
| KiD6  | D | Left sink basin       | Sink            | 210 | 13.00 |
| KiD60 | D | Stove fan interior    | Stove fan       | 328 | 21.43 |

|       |   |                      |                 |       |       |
|-------|---|----------------------|-----------------|-------|-------|
| KiD61 | D | Stove fan exterior   | Stove fan       | 1,101 | 55.09 |
| KiD62 | D | Upper cabinet handle | Cabinet - upper | 560   | 34.02 |
| KiD63 | D | Upper cabinet door   | Cabinet - upper | 459   | 25.08 |
| KiD65 | D | Microwave handle     | Microwave       | 183   | 12.01 |
| KiD66 | D | Microwave panel      | Microwave       | 290   | 19.40 |
| KiD67 | D | Microwave interior   | Microwave       | 351   | 20.10 |
| KiD68 | D | Sink floor           | Floor           | 1,087 | 55.30 |
| KiD69 | D | Sink floor           | Floor           | 925   | 47.98 |
| KiD7  | D | Left sink drain      | Sink            | 168   | 11.04 |
| KiD70 | D | Cabinet floor        | Floor           | 1,278 | 63.68 |
| KiD71 | D | Cabinet floor        | Floor           | 1,015 | 52.87 |
| KiD72 | D | Cabinet floor        | Floor           | 1,234 | 62.77 |
| KiD73 | D | Cabinet floor        | Floor           | 836   | 44.39 |
| KiD74 | D | Refrigerator floor   | Floor           | 1,330 | 68.05 |
| KiD75 | D | Refrigerator floor   | Floor           | 813   | 45.52 |
| KiD76 | D | Wall                 | Wall/backsplash | 424   | 22.81 |
| KiD77 | D | Stove backsplash     | Wall/backsplash | 753   | 42.66 |

|       |   |                    |                 |     |       |
|-------|---|--------------------|-----------------|-----|-------|
| KiD78 | D | Sink backsplash    | Wall/backsplash | 161 | 9.76  |
| KiD79 | D | Wall               | Wall/backsplash | 463 | 29.01 |
| KiD8  | D | Right sink basin   | Sink            | 313 | 20.40 |
| KiD80 | D | Counter backsplash | Wall/backsplash | 489 | 28.63 |
| KiD81 | D | Counter backsplash | Wall/backsplash | 890 | 47.71 |
| KiD82 | D | Wall               | Wall/backsplash | 417 | 25.13 |
| KiD83 | D | Sponge             | Other           | 123 | 7.88  |
| KiD84 | D | Oven door          | Oven/Stove      | 436 | 27.11 |
| KiD85 | D | Garbage can        | Other           | 77  | 7.79  |
| KiD86 | D | Garbage disposal   | Sink            | 184 | 10.33 |
| KiD87 | D | Dish drying pan    | Other           | 260 | 15.19 |
| KiD9  | D | Right sink basin   | Sink            | 151 | 11.28 |

<sup>1</sup> Groupings used in ANOSIM tests of beta diversity matrices to test for differences between surface types.  
\* Alpha-diversity metrics were calculated for 10,000 randomly selected sequences from each sample and averaged across 10 resampling events after sequences classified as “chloroplasts” were removed.

**Supplementary Table 2.** Average percent abundance of produce indicator taxa across replicate kitchen surfaces.

| <b>Kitchen surface</b>     | <b><i>Enterobacteriaceae</i></b> | <b><i>Microbacteriaceae</i></b> | <b>Bacillales</b> | <b>Produce - total</b> |
|----------------------------|----------------------------------|---------------------------------|-------------------|------------------------|
| Cabinet floor              | 1.788                            | 0.488                           | 1.210             | 3.487                  |
| Counter backsplash         | 4.710                            | 0.273                           | 1.427             | 6.410                  |
| Countertop back            | 8.149                            | 0.363                           | 2.815             | 11.327                 |
| Countertop front           | 14.313                           | 0.189                           | 3.447             | 17.949                 |
| Drawer                     | 3.793                            | 0.174                           | 0.939             | 4.906                  |
| Faucet                     | 4.333                            | 0.000                           | 0.973             | 5.307                  |
| Faucet handle              | 2.020                            | 0.010                           | 0.565             | 2.595                  |
| Freezer door               | 6.180                            | 0.103                           | 2.715             | 8.998                  |
| Freezer handle             | 5.920                            | 0.120                           | 1.140             | 7.180                  |
| Freezer interior           | 2.396                            | 0.205                           | 1.683             | 4.284                  |
| Freezer interior door      | 3.215                            | 0.220                           | 2.760             | 6.195                  |
| Freezer seal               | 2.633                            | 0.790                           | 1.610             | 5.033                  |
| Garbage can                | 0.020                            | 1.355                           | 0.765             | 2.140                  |
| Garbage disposal           | 0.845                            | 0.030                           | 10.640            | 11.515                 |
| Left sink basin            | 3.434                            | 0.011                           | 3.117             | 6.563                  |
| Left sink drain            | 1.868                            | 0.040                           | 10.675            | 12.583                 |
| Lower cabinet door         | 2.817                            | 1.170                           | 2.387             | 6.374                  |
| Lower cabinet door sink    | 3.053                            | 0.352                           | 3.020             | 6.425                  |
| Lower cabinet handle       | 3.018                            | 0.242                           | 7.466             | 10.726                 |
| Lower cabinet handle sink  | 4.680                            | 0.134                           | 8.934             | 13.748                 |
| Microwave handle           | 0.740                            | 0.065                           | 2.010             | 2.815                  |
| Microwave interior         | 1.945                            | 0.120                           | 0.885             | 2.950                  |
| Microwave panel            | 1.143                            | 0.090                           | 3.557             | 4.790                  |
| Oven handle                | 3.873                            | 0.077                           | 20.397            | 24.347                 |
| Refrigerator bottom shelf  | 3.501                            | 0.566                           | 3.865             | 7.933                  |
| Refrigerator door          | 8.390                            | 0.055                           | 0.810             | 9.255                  |
| Refrigerator drawer        | 8.350                            | 0.196                           | 3.863             | 12.409                 |
| Refrigerator floor         | 1.600                            | 0.463                           | 1.573             | 3.636                  |
| Refrigerator handle        | 6.087                            | 0.020                           | 1.830             | 7.937                  |
| Refrigerator interior door | 2.597                            | 0.363                           | 6.594             | 9.554                  |
| Refrigerator middle shelf  | 5.529                            | 0.257                           | 6.916             | 12.701                 |
| Refrigerator seal          | 3.035                            | 0.235                           | 0.355             | 3.625                  |

|                        |        |       |        |        |
|------------------------|--------|-------|--------|--------|
| Refrigerator top shelf | 4.496  | 0.172 | 0.828  | 5.496  |
| Right sink basin       | 4.006  | 0.010 | 8.530  | 12.546 |
| Right sink drain       | 2.130  | 0.000 | 1.550  | 3.680  |
| Sink backsplash        | 5.707  | 0.070 | 1.130  | 6.907  |
| Sink floor             | 1.573  | 0.494 | 2.135  | 4.201  |
| Stove backsplash       | 13.033 | 0.453 | 2.125  | 15.610 |
| Stove fan exterior     | 2.023  | 0.753 | 0.920  | 3.697  |
| Stove knobs            | 4.377  | 0.190 | 2.550  | 7.117  |
| Stove top              | 7.080  | 0.133 | 16.145 | 23.358 |
| Upper cabinet door     | 2.293  | 0.852 | 2.115  | 5.260  |
| Upper cabinet handle   | 2.457  | 0.210 | 1.588  | 4.255  |
| Wall                   | 3.275  | 0.708 | 4.983  | 8.965  |

**Supplementary Table 3.** Average percent abundance of palm indicator taxa across all kitchen surfaces.

| <b>Kitchen surface</b>     | <b><i>Corynebacteriaceae</i></b> | <b><i>Propionibacteriaceae</i></b> | <b><i>Staphylococcaceae</i></b> | <b><i>Streptococcaceae</i></b> | <b>Palm - total</b> |
|----------------------------|----------------------------------|------------------------------------|---------------------------------|--------------------------------|---------------------|
| Cabinet floor              | 3.282                            | 0.064                              | 13.200                          | 15.142                         | <b>31.688</b>       |
| Counter backsplash         | 1.913                            | 0.038                              | 3.170                           | 2.282                          | <b>7.403</b>        |
| Countertop back            | 4.546                            | 0.099                              | 4.392                           | 4.004                          | <b>13.041</b>       |
| Countertop front           | 3.567                            | 0.083                              | 4.956                           | 12.444                         | <b>21.050</b>       |
| Drawer                     | 6.880                            | 0.339                              | 3.369                           | 19.583                         | <b>30.170</b>       |
| Faucet                     | 0.370                            | 0.050                              | 0.190                           | 0.850                          | <b>1.460</b>        |
| Faucet handle              | 3.080                            | 0.205                              | 0.875                           | 7.215                          | <b>11.375</b>       |
| Freezer door               | 8.863                            | 0.398                              | 7.630                           | 15.295                         | <b>32.185</b>       |
| Freezer handle             | 7.760                            | 0.687                              | 4.743                           | 16.453                         | <b>29.643</b>       |
| Freezer interior           | 2.206                            | 0.096                              | 1.531                           | 13.869                         | <b>17.703</b>       |
| Freezer interior door      | 1.230                            | 0.125                              | 2.145                           | 2.743                          | <b>6.243</b>        |
| Freezer seal               | 5.783                            | 0.130                              | 4.195                           | 4.840                          | <b>14.948</b>       |
| Garbage can                | 1.795                            | 0.045                              | 49.290                          | 2.515                          | <b>53.645</b>       |
| Garbage disposal           | 0.000                            | 0.000                              | 0.000                           | 0.410                          | <b>0.410</b>        |
| Left sink basin            | 0.666                            | 0.030                              | 0.461                           | 7.099                          | <b>8.256</b>        |
| Left sink drain            | 0.023                            | 0.000                              | 0.040                           | 0.293                          | <b>0.355</b>        |
| Lower cabinet door         | 5.876                            | 0.132                              | 5.522                           | 2.609                          | <b>14.139</b>       |
| Lower cabinet door sink    | 5.165                            | 0.183                              | 3.747                           | 3.945                          | <b>13.040</b>       |
| Lower cabinet handle       | 9.156                            | 0.381                              | 4.849                           | 11.011                         | <b>25.398</b>       |
| Lower cabinet handle sink  | 6.468                            | 0.384                              | 3.196                           | 7.446                          | <b>17.494</b>       |
| Microwave handle           | 20.480                           | 0.630                              | 9.660                           | 20.670                         | <b>51.440</b>       |
| Microwave interior         | 1.840                            | 0.110                              | 1.575                           | 46.235                         | <b>49.760</b>       |
| Microwave panel            | 17.033                           | 1.417                              | 6.770                           | 32.443                         | <b>57.663</b>       |
| Oven handle                | 5.513                            | 0.183                              | 3.433                           | 13.367                         | <b>22.497</b>       |
| Refrigerator bottom shelf  | 1.090                            | 0.090                              | 1.064                           | 15.259                         | <b>17.503</b>       |
| Refrigerator door          | 1.610                            | 0.055                              | 0.845                           | 28.360                         | <b>30.870</b>       |
| Refrigerator drawer        | 3.286                            | 0.057                              | 0.826                           | 3.626                          | <b>7.794</b>        |
| Refrigerator floor         | 4.269                            | 0.080                              | 15.253                          | 13.396                         | <b>32.997</b>       |
| Refrigerator handle        | 21.973                           | 0.497                              | 3.093                           | 12.863                         | <b>38.427</b>       |
| Refrigerator interior door | 4.176                            | 0.309                              | 2.776                           | 12.596                         | <b>19.856</b>       |
| Refrigerator middle shelf  | 2.290                            | 0.141                              | 2.780                           | 19.076                         | <b>24.287</b>       |
| Refrigerator seal          | 2.285                            | 0.265                              | 4.315                           | 21.330                         | <b>28.195</b>       |

|                        |        |       |        |        |               |
|------------------------|--------|-------|--------|--------|---------------|
| Refrigerator top shelf | 1.000  | 0.080 | 1.198  | 26.892 | <b>29.170</b> |
| Right sink basin       | 0.263  | 0.006 | 0.096  | 1.053  | <b>1.417</b>  |
| Right sink drain       | 0.007  | 0.000 | 0.010  | 0.127  | <b>0.143</b>  |
| Sink backsplash        | 0.363  | 0.007 | 0.297  | 1.570  | <b>2.237</b>  |
| Sink floor             | 5.128  | 0.085 | 17.065 | 8.964  | <b>31.241</b> |
| Stove backsplash       | 1.583  | 0.108 | 1.395  | 2.125  | <b>5.210</b>  |
| Stove fan exterior     | 6.547  | 0.077 | 5.180  | 8.820  | <b>20.623</b> |
| Stove knobs            | 9.533  | 0.297 | 3.203  | 13.290 | <b>26.323</b> |
| Stove top              | 3.313  | 0.048 | 2.603  | 4.065  | <b>10.028</b> |
| Upper cabinet door     | 6.412  | 0.342 | 5.722  | 6.010  | <b>18.485</b> |
| Upper cabinet handle   | 12.292 | 0.812 | 7.040  | 18.285 | <b>38.428</b> |
| Wall                   | 2.584  | 0.059 | 2.308  | 7.904  | <b>12.854</b> |



**Supplementary Table 4.** Average percent abundance of faucet water indicator taxa across all kitchen surfaces.

| <b>Kitchen surface</b>     | <b><i>Gallionellaceae</i></b> | <b><i>Methylobacteriaceae</i></b> | <b><i>Sphingomonadaceae</i></b> | <b>Faucet water – total</b> |
|----------------------------|-------------------------------|-----------------------------------|---------------------------------|-----------------------------|
| Cabinet floor              | 0.017                         | 0.909                             | 3.947                           | <b>4.873</b>                |
| Counter backsplash         | 0.013                         | 0.682                             | 3.670                           | <b>4.365</b>                |
| Countertop back            | 0.048                         | 0.571                             | 4.217                           | <b>4.837</b>                |
| Countertop front           | 0.036                         | 0.318                             | 2.194                           | <b>2.548</b>                |
| Drawer                     | 0.020                         | 0.430                             | 2.359                           | <b>2.809</b>                |
| Faucet                     | 0.000                         | 4.623                             | 27.483                          | <b>32.107</b>               |
| Faucet handle              | 0.020                         | 1.390                             | 6.410                           | <b>7.820</b>                |
| Freezer door               | 0.033                         | 0.265                             | 1.398                           | <b>1.695</b>                |
| Freezer handle             | 0.057                         | 0.507                             | 2.170                           | <b>2.733</b>                |
| Freezer interior           | 0.031                         | 0.641                             | 1.939                           | <b>2.611</b>                |
| Freezer interior door      | 0.018                         | 0.465                             | 4.308                           | <b>4.790</b>                |
| Freezer seal               | 0.030                         | 0.960                             | 5.538                           | <b>6.528</b>                |
| Garbage can                | 0.000                         | 2.325                             | 0.755                           | <b>3.080</b>                |
| Garbage disposal           | 0.030                         | 0.040                             | 2.500                           | <b>2.570</b>                |
| Left sink basin            | 0.000                         | 0.651                             | 4.863                           | <b>5.514</b>                |
| Left sink drain            | 0.000                         | 1.048                             | 4.745                           | <b>5.793</b>                |
| Lower cabinet door         | 0.047                         | 0.630                             | 3.963                           | <b>4.640</b>                |
| Lower cabinet door sink    | 0.067                         | 0.868                             | 4.393                           | <b>5.328</b>                |
| Lower cabinet handle       | 0.136                         | 0.627                             | 3.194                           | <b>3.958</b>                |
| Lower cabinet handle sink  | 0.020                         | 1.810                             | 4.602                           | <b>6.432</b>                |
| Microwave handle           | 0.035                         | 0.030                             | 0.200                           | <b>0.265</b>                |
| Microwave interior         | 0.075                         | 0.730                             | 3.055                           | <b>3.860</b>                |
| Microwave panel            | 0.003                         | 0.270                             | 1.293                           | <b>1.567</b>                |
| Oven handle                | 0.120                         | 0.483                             | 2.003                           | <b>2.607</b>                |
| Refrigerator bottom shelf  | 0.051                         | 0.349                             | 3.008                           | <b>3.408</b>                |
| Refrigerator door          | 0.025                         | 0.115                             | 1.515                           | <b>1.655</b>                |
| Refrigerator drawer        | 0.041                         | 2.054                             | 2.844                           | <b>4.940</b>                |
| Refrigerator floor         | 0.029                         | 0.894                             | 4.014                           | <b>4.937</b>                |
| Refrigerator handle        | 0.000                         | 0.197                             | 1.167                           | <b>1.363</b>                |
| Refrigerator interior door | 0.001                         | 0.350                             | 2.054                           | <b>2.406</b>                |
| Refrigerator middle shelf  | 0.070                         | 0.353                             | 2.561                           | <b>2.984</b>                |
| Refrigerator seal          | 0.005                         | 0.585                             | 2.990                           | <b>3.580</b>                |

|                        |       |       |       |              |
|------------------------|-------|-------|-------|--------------|
| Refrigerator top shelf | 0.010 | 0.156 | 1.952 | <b>2.118</b> |
| Right sink basin       | 0.003 | 1.654 | 6.966 | <b>8.623</b> |
| Right sink drain       | 0.007 | 0.203 | 5.827 | <b>6.037</b> |
| Sink backsplash        | 0.010 | 0.453 | 4.770 | <b>5.233</b> |
| Sink floor             | 0.014 | 0.920 | 3.540 | <b>4.474</b> |
| Stove backsplash       | 0.193 | 0.523 | 4.340 | <b>5.055</b> |
| Stove fan exterior     | 0.007 | 1.067 | 6.390 | <b>7.463</b> |
| Stove knobs            | 0.033 | 0.790 | 3.533 | <b>4.357</b> |
| Stove top              | 0.008 | 0.368 | 3.513 | <b>3.888</b> |
| Upper cabinet door     | 0.107 | 0.825 | 7.775 | <b>8.707</b> |
| Upper cabinet handle   | 0.013 | 0.237 | 2.192 | <b>2.442</b> |
| Wall                   | 0.058 | 1.771 | 4.910 | <b>6.739</b> |

**Supplementary Table 5.** The bacterial communities of the food items listed below were characterized using barcoded pyrosequencing and averaged across all foods to identify bacterial taxa indicative of raw produce (J. W. Leff *et al.*, unpublished data). Note that for all produce items, both conventionally and organically grown produce was characterized.

| <b>Food Item</b> | <b># of replicates</b> |
|------------------|------------------------|
| Alfalfa sprouts  | 10                     |
| Apple            | 17                     |
| Bean sprouts     | 7                      |
| Grapes           | 18                     |
| Lettuce          | 17                     |
| Mushrooms        | 16                     |
| Peach            | 18                     |
| Pepper           | 22                     |
| Spinach          | 20                     |
| Strawberries     | 24                     |
| Tomato           | 23                     |
